# Supplementary material for: Targeting Aquaporin-4 Subcellular Localization to Treat Central Nervous System Edema
Source: PubMed Central journal article supplement (PMC7242911; doi:10.1016/j.cell.2020.03.037), 2020-05-14
Supplement: mmc1.pdf [file mmc1.pdf]

**Supplemental Information**

**Targeting Aquaporin-4 Subcellular Localization  
to Treat Central Nervous System Edema**

**Philip Kitchen, Mootaz M. Salman, Andrea M. Halsey, Charlotte Clarke-Bland, Justin A. MacDonald, Hiroaki Ishida, Hans J. Vogel, Sharif Almutiri, Ann Logan, Stefan Kreida, Tamim Al-Jubair, Julie Winkel Missel, Pontus Gourdon, Susanna Törnroth-Horsefield, Matthew T. Conner, Zubair Ahmed, Alex C. Conner, and Roslyn M. Bill**

**Supplementary Table S1.** Mean  $\pm$  SEM CAP response latencies after DC injury and Vehicle, CaM<sub>i</sub>, PKA<sub>i</sub> or PKC<sub>i</sub> treatment. Despite CAP response latencies in DC + CaM<sub>i</sub> and PKA<sub>i</sub>-treated rats being approximately 3 times longer than Sham-rats, no CAP response latencies were detectable in DC + Vehicle or DC + PKC<sub>i</sub>-treated rats due to the absence of evoked activity. ND = not detectable. Related to Figure 4.

|                             | <b>Sham</b>   | <b>DC + Vehicle</b> | <b>DC + CaM<sub>i</sub></b> | <b>DC + PKA<sub>i</sub></b> | <b>DC + PKC<sub>i</sub></b> |
|-----------------------------|---------------|---------------------|-----------------------------|-----------------------------|-----------------------------|
| Mean latency $\pm$ SEM (ms) | 6.2 $\pm$ 1.5 | ND                  | 20.6 $\pm$ 4.9              | 20.4 $\pm$ 4.8              | ND                          |
