# Supplementary material for: Targeting Aquaporin-4 Subcellular Localization to Treat Central Nervous System Edema
Source: PubMed Central journal article supplement (PMC7242911; doi:10.1016/j.cell.2020.03.037), 2020-05-14
Supplement: mmc2.pdf [file mmc2.pdf]

**Supplementary Table S2.** p values for statistical comparisons in Figures 1, 2, 4 and S1-6; p values highlighted in bold text have values < 0.05.

| Figure                      | Panel                       | Comparison                                                  | p/corrected p              |
|-----------------------------|-----------------------------|-------------------------------------------------------------|----------------------------|
| 1                           | a                           | Hypoxia vs control                                          | <b>0.00044</b>             |
|                             |                             | Hypotonicity vs control                                     | <b>0.046</b>               |
|                             |                             | EGTA-AM vs control                                          | 11                         |
|                             |                             | Hypoxia EGTA-AM vs control                                  | 6.4                        |
|                             |                             | Hypotonicity EGTA-AM vs control                             | 0.43                       |
|                             |                             | TFP vs control                                              | 8.8                        |
|                             |                             | Hypoxia TFP vs control                                      | 7.9                        |
|                             |                             | Hypotonicity TFP vs control                                 | 2.1                        |
|                             |                             | TRPV <sub>4i</sub> vs control                               | 11                         |
|                             |                             | Hypoxia TRPV <sub>4i</sub> vs control                       | 4.4                        |
|                             |                             | Hypotonicity TRPV <sub>4i</sub> vs control                  | 13                         |
|                             |                             | TRPV <sub>4a</sub> vs control                               | <b>0.0016</b>              |
|                             |                             | Hypoxia TRPV <sub>4a</sub> vs control                       | <b>0.00024</b>             |
|                             |                             | Hypotonicity TRPV <sub>4a</sub> vs control                  | <b>2.5×10<sup>-5</sup></b> |
|                             | b                           | 1 h vs normoxia                                             | 0.25                       |
|                             |                             | 3 h vs normoxia                                             | 0.96                       |
|                             |                             | 6 h vs normoxia                                             | <b>0.035</b>               |
|                             |                             | 6+1 h vs normoxia                                           | <b>0.0036</b>              |
|                             |                             | 6+3 h vs normoxia                                           | <b>0.041</b>               |
|                             |                             | 6+6 h vs normoxia                                           | 0.15                       |
|                             | c                           | TFP vs normoxia                                             | 0.074                      |
|                             |                             | EGTA-AM vs normoxia                                         | 0.056                      |
|                             |                             | Hypoxia vs normoxia                                         | <b>0.015</b>               |
|                             |                             | Hypoxia TFP vs normoxia                                     | 0.96                       |
|                             |                             | Hypoxia EGTA-AM vs normoxia                                 | 0.13                       |
|                             | d                           | Hypoxia vs normoxia RM 2-way ANOVA hypoxia×time interaction | <b>0.00070</b>             |
|                             | f                           | cAMP control vs forskolin                                   | <b>0.018</b>               |
|                             |                             | cAMP control vs hypotonicity                                | <b>0.015</b>               |
|                             |                             | cAMP control vs hypotonicity Ca <sup>2+</sup> free          | 1.2                        |
|                             |                             | cAMP control vs hypotonicity + W-7                          | 0.67                       |
|                             |                             | cAMP control vs hypotonicity + TFP                          | 0.20                       |
|                             |                             | cAMP control vs CALP-3                                      | <b>0.028</b>               |
|                             |                             | PKA control vs forskolin                                    | <b>9.1×10<sup>-5</sup></b> |
|                             |                             | PKA control vs hypotonicity                                 | <b>0.0023</b>              |
|                             |                             | PKA control vs hypotonicity Ca <sup>2+</sup> free           | 0.99                       |
|                             |                             | PKA control vs hypotonicity + W-7                           | 0.80                       |
|                             |                             | PKA control vs hypotonicity + TFP                           | 3.3                        |
|                             |                             | PKA control vs CALP-3                                       | <b>0.0024</b>              |
| 2                           | a                           | 3 day sham vs DC+Vehicle                                    | <b>3.7×10<sup>-5</sup></b> |
|                             |                             | 3 day sham vs DC+CaMi                                       | <b>0.0060</b>              |
|                             |                             | 3 day sham vs DC+PKAi                                       | <b>0.0050</b>              |
|                             |                             | 7 day sham vs DC+Vehicle                                    | <b>0.024</b>               |
|                             |                             | 7 day sham vs DC+CaMi                                       | <b>0.021</b>               |
|                             |                             | 7 day sham vs DC+PKAi                                       | <b>0.019</b>               |
|                             |                             | 28 day sham vs DC+Vehicle                                   | 0.56                       |
|                             |                             | 28 day sham vs DC+CaMi                                      | 0.16                       |
|                             |                             | 28 day sham vs DC+PKAi                                      | 1.0                        |
|                             | b                           | Sham vs DC+Vehicle                                          | <b>5.0×10<sup>-6</sup></b> |
|                             |                             | Vehicle vs TFP                                              | <b>0.032</b>               |
|                             |                             | Vehicle vs W-7                                              | <b>4.3×10<sup>-5</sup></b> |
|                             |                             | Vehicle vs PKA <sub>i</sub>                                 | <b>0.00029</b>             |
|                             |                             | Vehicle vs AR1 <sub>i</sub>                                 | 0.75                       |
| Vehicle vs D2R <sub>i</sub> |                             | <b>0.038</b>                                                |                            |
| Vehicle vs PKC <sub>i</sub> | <b>0.038</b>                |                                                             |                            |
| g                           | Sham vs DC+Vehicle          | <b>3.2×10<sup>-7</sup></b>                                  |                            |
|                             | Vehicle vs CaM <sub>i</sub> | <b>1.3×10<sup>-6</sup></b>                                  |                            |
|                             | Vehicle vs PKA <sub>i</sub> | <b>9.0×10<sup>-6</sup></b>                                  |                            |
| h                           | Sham vs DC+Vehicle          | <b>0.0020</b>                                               |                            |
|                             | Vehicle vs CaMi             | <b>0.022</b>                                                |                            |
|                             | Vehicle vs PKAi             | <b>0.0090</b>                                               |                            |

|                                            |                                   |                                               |                            |
|--------------------------------------------|-----------------------------------|-----------------------------------------------|----------------------------|
| <b>4</b>                                   | <b>b</b>                          | Vehicle vs CaM <sub>i</sub>                   | <b>0.00012</b>             |
|                                            |                                   | Vehicle vs PKA <sub>i</sub>                   | <b>0.00011</b>             |
|                                            |                                   | Vehicle vs PKC <sub>i</sub>                   | 3.8                        |
|                                            | <b>c</b>                          | Vehicle vs CaM <sub>i</sub>                   | <b>0.00013</b>             |
|                                            |                                   | Vehicle vs PKA <sub>i</sub>                   | <b>0.00014</b>             |
|                                            |                                   | Vehicle vs PKC <sub>i</sub>                   | 2.1                        |
|                                            | <b>d</b>                          | Sham vs DC+Vehicle                            | <b>0.00010</b>             |
| Vehicle vs CaM <sub>i</sub>                |                                   | <b>0.00010</b>                                |                            |
| Vehicle vs PKA <sub>i</sub>                |                                   | <b>0.00011</b>                                |                            |
| <b>e</b>                                   | Vehicle vs PKC <sub>i</sub>       | 4.2                                           |                            |
|                                            | Sham vs DC+Vehicle                | <b>0.0010</b>                                 |                            |
|                                            | Vehicle vs CaM <sub>i</sub>       | <b>0.0013</b>                                 |                            |
| <b>f</b>                                   | Vehicle vs PKA <sub>i</sub>       | <b>0.0014</b>                                 |                            |
|                                            | Vehicle vs PKC <sub>i</sub>       | 1.8                                           |                            |
|                                            | Sham vs DC+Vehicle                | <b>6.0×10<sup>-5</sup></b>                    |                            |
| <b>g</b>                                   | Vehicle vs CaM <sub>i</sub>       | <b>0.0015</b>                                 |                            |
|                                            | Vehicle vs PKA <sub>i</sub>       | <b>0.00089</b>                                |                            |
|                                            | DC+Vehicle vs DC+CaM <sub>i</sub> | <b>4.0×10<sup>-10</sup></b>                   |                            |
| <b>S1</b>                                  | <b>c</b>                          | Control vs shAQP4 3 dpi                       | <b>0.00012</b>             |
|                                            |                                   | Control vs shAQP4 28 dpi                      | <b>9.0×10<sup>-5</sup></b> |
| <b>d</b>                                   | Vehicle vs control 3dpi           | 4.4                                           |                            |
|                                            | Vehicle vs shAQP4 3dpi            | <b>0.00011</b>                                |                            |
|                                            | Vehicle vs control 28 dpi         | 4.2                                           |                            |
|                                            | Vehicle vs shAQP4 28 dpi          | <b>9.0×10<sup>-5</sup></b>                    |                            |
| <b>S2</b>                                  |                                   | Sham vs injury contra                         | <b>0.00011</b>             |
|                                            |                                   | Injury vs injury+CaM <sub>i</sub> ipsi        | <b>0.00010</b>             |
|                                            |                                   | Injury vs injury+PKA <sub>i</sub> ipsi        | <b>0.00011</b>             |
|                                            |                                   | Injury vs injury+PKC <sub>i</sub> ipsi        | 2.3                        |
|                                            |                                   | Sham vs injury ipsi                           | 2.3                        |
|                                            |                                   | Injury vs injury+CaM <sub>i</sub> contra      | 3.1                        |
|                                            |                                   | Injury vs injury+PKA <sub>i</sub> contra      | 2.8                        |
|                                            |                                   | Injury vs injury+PKC <sub>i</sub> contra      | 2.8                        |
| <b>S3</b>                                  | <b>d</b>                          | Sham vs DC+Vehicle                            | <b>2.9×10<sup>-5</sup></b> |
|                                            |                                   | Sham vs DC+Vehicle (away)                     | 1.0                        |
|                                            |                                   | DC+Vehicle vs DC+Vehicle (away)               | <b>0.00010</b>             |
| <b>e</b>                                   | Sham vs DC+Vehicle                | <b>0.0080</b>                                 |                            |
|                                            | Sham vs DC+Vehicle (away)         | 1.0                                           |                            |
|                                            | DC+Vehicle vs DC+Vehicle (away)   | <b>0.010</b>                                  |                            |
| <b>S4</b>                                  | <b>e</b>                          | PKA control vs forskolin                      | <b>0.00050</b>             |
|                                            |                                   | PKA control vs hypotonicity                   | <b>0.014</b>               |
|                                            |                                   | PKA control vs hypotonicity+TFP               | 3.4                        |
|                                            |                                   | Akt control vs forskolin                      | <b>0.038</b>               |
|                                            | <b>h</b>                          | Akt control vs hypotonicity                   | <b>0.044</b>               |
|                                            |                                   | Akt control vs hypotonicity+TFP               | 2.8                        |
|                                            |                                   | Nuclear FOXO3A control vs forskolin 10 min    | 0.078                      |
|                                            |                                   | Nuclear FOXO3A control vs hypotonicity 10 min | 2.9                        |
| Nuclear FOXO3A control vs forskolin 1 h    | <b>0.00060</b>                    |                                               |                            |
| Nuclear FOXO3A control vs hypotonicity 1 h | 0.11                              |                                               |                            |
| Nuclear FOXO3A control vs forskolin 6 h    | <b>0.0047</b>                     |                                               |                            |
| Nuclear FOXO3A control vs hypotonicity 6 h | <b>0.0066</b>                     |                                               |                            |
| <b>S5</b>                                  | <b>g</b>                          | AQP4 translocation WT vs F258/262/266A        | <b>0.00040</b>             |
|                                            |                                   | AQP4 translocation WT vs F258A                | 1.4                        |
|                                            |                                   | AQP4 translocation WT vs F262A                | 3.3                        |
|                                            |                                   | AQP4 translocation WT vs F266A                | 0.72                       |
| <b>S6</b>                                  | <b>b</b>                          | AQP4 vs control                               | <b>0.0015</b>              |
